# Supplementary material for: Cardiovascular disease risk factor responses to a type 2 diabetes care model including nutritional ketosis induced by sustained carbohydrate restriction at 1 year: an open label, non-randomized, controlled study
Source: Springer Nature journal article supplement (doi:10.1186/s12933-018-0698-8), 2018-04-17

**A**

Change in Apo B

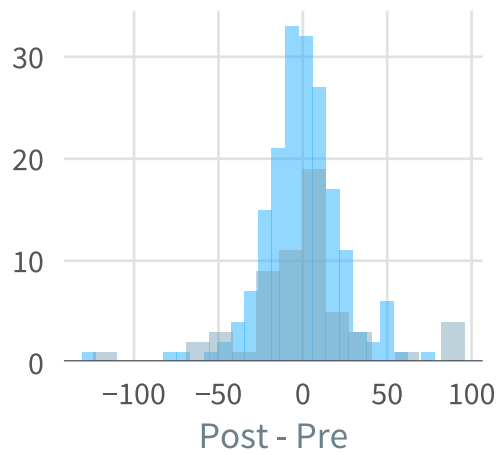**B**

Change in Apo A1

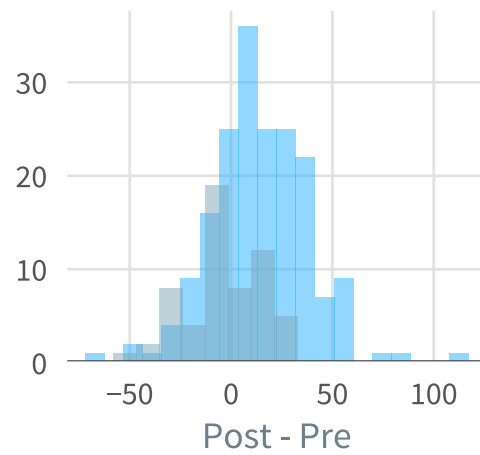**C**

Change in Apo B/Apo A1 ratio

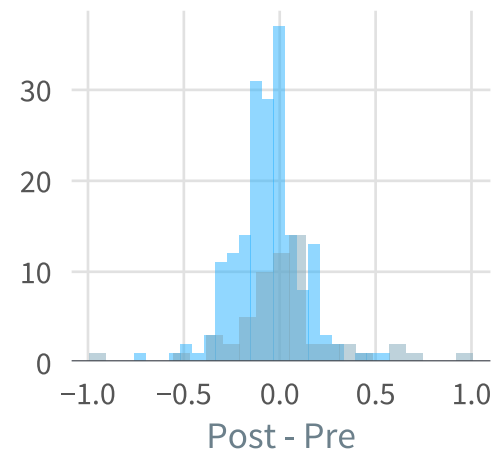**D**

Change in LDL-P

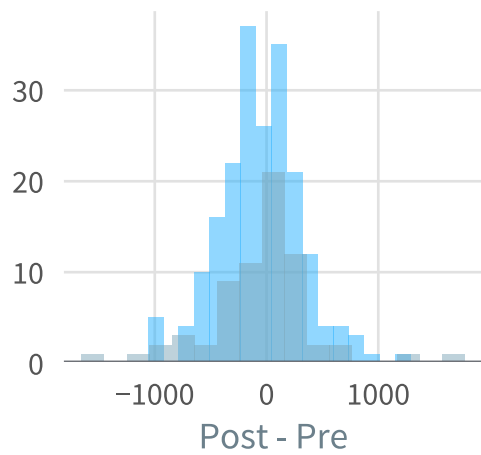**E**

Change in Small LDL-P

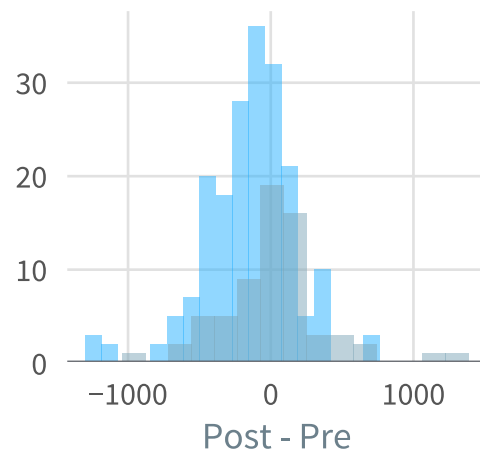**F**

Change in Large VLDL-P

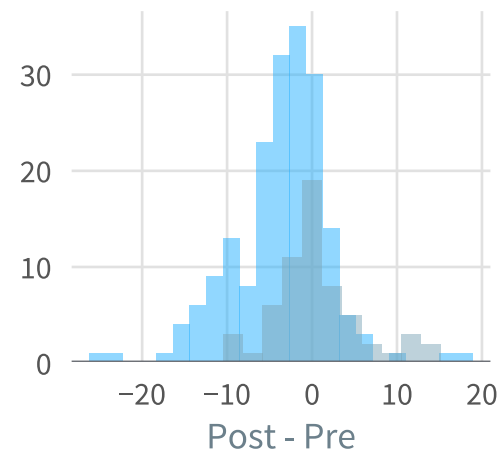**G**

Change in Triglyceride/HDL-C ratio

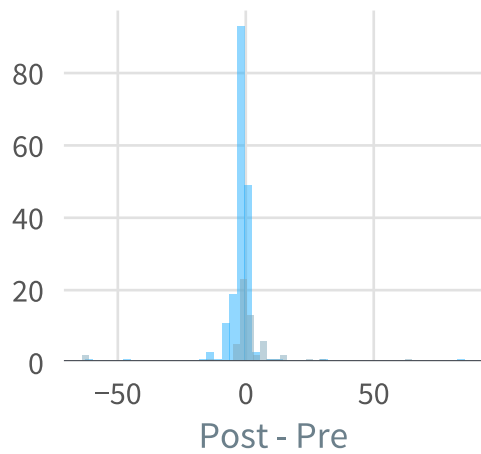

Supplement: MOESM3 [file 15731152]
